# Supplementary material
Source: publisher figshare collection journal article supplement (https://tandf.figshare.com/articles/dataset/_/7726094)
Supplement: Supplementary file 1 [file 2]

Table SI Frequency of occurrence (FO%) of prey items in pellets of Caspian Tern (*Hydroprogne caspia*) and Royal Tern (*Thalasseus maximus*) by prey domain, family species (or lowest taxonomic level identified) and site. Samples collected from 2013 to 2015 in Guinea-Bissau and Guinea. Sample sizes (*N*) represent the total number of pellets analysed.

n.i. - not identified

| Domain      | Family           | Species                            | Caspian Tern    |                 | Royal Tern |        |          |
|-------------|------------------|------------------------------------|-----------------|-----------------|------------|--------|----------|
|             |                  |                                    | Bijagós<br>2013 | Bijagós<br>2014 | Bijagós    | Djeta  | Naufrage |
|             |                  |                                    | FO%             | FO%             | FO%        | FO%    | FO%      |
|             |                  |                                    | (N=52)          | (N=100)         | (N=73)     | (N=18) | (N=50)   |
| Pelagic     | FISH             |                                    |                 |                 |            |        |          |
|             |                  |                                    | 78.8            | 81.0            | 97.3       | 88.9   | 90.0     |
|             | Carangidae       |                                    | 5.8             | 1.0             | 4.1        | 0.0    | 2.0      |
|             |                  | <i>Hemicaranx bicolor</i> §        | 1.9             | 0.0             | 1.4        | 0.0    | 0.0      |
|             |                  | Carangidae n.i. ¥                  | 0.0             | 1.0             | 2.7        | 0.0    | 2.0      |
|             | Clupeidae        |                                    | 75.0            | 71.0            | 86.3       | 5.6    | 67.4     |
|             |                  | <i>Sardinella</i> n.i. ¥           | 67.3            | 26.0            | 67.1       | 5.6    | 46.0     |
|             |                  | <i>Sardinella aurita</i> ¥         | 0.0             | 5.0             | 0.0        | 0.0    | 4.0      |
|             |                  | <i>Sardinella maderensis</i> ¥     | 7.7             | 34.0            | 17.8       | 0.0    | 16.0     |
|             |                  | <i>Ethmalosa fimbriata</i> ¥       | 0.0             | 5.0             | 0.0        | 0.0    | 0.0      |
|             |                  | Clupeidae n.i. ¥                   | 0.0             | 2.0             | 1.4        | 0.0    | 0.0      |
|             | Hemiramphidae    | Hemiramphidae n.i. ¥               | 0.0             | 9.0             | 4.1        |        |          |
|             | Pristigasteridae | <i>Ilisha africana</i> ¥           | 5.8             | 12.0            | 16.4       | 83.3   | 38.0     |
|             | Scombridae       |                                    | 1.9             | 0.0             | 2.7        | 0.0    | 0.0      |
|             |                  | <i>Scomberomorus tritor</i> ¥      | 1.9             | 0.0             | 0.0        | 0.0    | 0.0      |
|             |                  | <i>Scomber colias</i> ¥            | 0.0             | 0.0             | 2.7        | 0.0    | 0.0      |
|             | Benthopelagic    |                                    |                 | 36.5            | 41.0       | 21.9   | 27.8     |
| Ariidae     |                  | <i>Carlarius</i> n.i. §            | 0.0             | 0.0             | 0.0        | 5.6    | 0.0      |
| Gerreidae   |                  |                                    | 3.8             | 9.0             | 0.0        | 0.0    | 2.0      |
|             |                  | <i>Eucinostomus melanopterus</i> ¥ | 0.0             | 3.0             | 0.0        | 0.0    | 2.0      |
|             |                  | <i>Gerres nigri</i> ¥              | 1.9             | 4.0             | 0.0        | 0.0    | 0.0      |
|             |                  | Gerreidae n.i. ¥                   | 1.9             | 2.0             | 0.0        | 0.0    | 0.0      |
| Haemulidae  |                  |                                    | 17.3            | 3.0             | 8.2        | 5.6    | 2.0      |
|             |                  | <i>Pomadasys</i> n.i. ¥            | 1.9             | 1.0             | 1.4        | 5.6    | 0.0      |
|             |                  | Haemulidae n.i. ¥                  | 15.4            | 2.0             | 6.8        | 0.0    | 2.0      |
| Mugilidae   |                  |                                    | 1.9             | 13.0            | 0.0        | 0.0    | 0.0      |
|             |                  | <i>Liza</i> n.i. ¥                 | 0.0             | 1.0             | 0.0        | 0.0    | 0.0      |
|             |                  | Mugilidae n.i. ¥                   | 1.9             | 12.0            | 0.0        | 0.0    | 0.0      |
| Polynemidae |                  | <i>Galeoides decadactylus</i> ¥    | 11.5            | 14.0            | 8.2        | 5.6    | 18.0     |
| Sciaenidae  |                  |                                    | 1.9             | 6.0             | 5.5        | 16.7   | 8.0      |

|                   |                   |                                  |            |            |            |            |            |
|-------------------|-------------------|----------------------------------|------------|------------|------------|------------|------------|
| <b>Benthic</b>    |                   | <i>Pseudolithus elongatus</i> §  | 0.0        | 3.0        | 2.7        | 11.1       | 0.0        |
|                   |                   | <i>Pseudolithus typus</i> §      | 0.0        | 0.0        | 0.0        | 5.6        | 0.0        |
|                   |                   | Pseudolithus n.i. §              | 1.9        | 0.0        | 0.0        | 0.0        | 4.0        |
|                   |                   | <i>Pteroscion peli</i> §         | 0.0        | 1.0        | 2.7        | 0.0        | 4.0        |
|                   |                   | Sciaenidae n.i. §                | 0.0        | 2.0        | 0.0        | 0.0        | 0.0        |
|                   | Serranidae        | <i>Epinephelus</i> n.i. §        | 1.9        | 0.0        | 0.0        | 0.0        | 0.0        |
| <b>Benthic</b>    | Paralichthyidae   | <i>Citharichthys stampflii</i> § | <b>0.0</b> | <b>0.0</b> | <b>1.4</b> | <b>5.6</b> | <b>0.0</b> |
|                   | Unidentified fish |                                  | 11.5       | 5.0        | 2.7        | 5.6        | 0.0        |
| <b>CRUSTACEAN</b> |                   |                                  |            |            |            |            |            |
|                   | Decapoda          | Crab n.i.                        | 1.9        | 0.0        | 0.0        | 0.0        | 2.0        |

Table SII Numerical frequency (N%) of prey items in pellets of Caspian Tern (*Hydroprogne caspia*) and Royal Tern (*Thalasseus maximus*) by prey domain, family species (or lowest taxonomic level identified) and site. Samples collected from 2013 to 2015 in Guinea-Bissau and Guinea. Sample sizes (N) represent the total number of prey individuals analysed. n.i. - not identified. Prey are categorized as schooling (¥) or solitary (§).

| Domain        | Family           | Species                            | Caspian Tern    |                 | Royal Tern |        |          |
|---------------|------------------|------------------------------------|-----------------|-----------------|------------|--------|----------|
|               |                  |                                    | Bijagós<br>2013 | Bijagós<br>2014 | Bijagós    | Djeta  | Naufrage |
|               |                  |                                    | N%              | N%              | N%         | N%     | N%       |
|               |                  |                                    | (N=88)          | (N=169)         | (N=126)    | (N=24) | (N=91)   |
|               | FISH             |                                    |                 |                 |            |        |          |
| Pelagic       |                  |                                    | 65.9            | 68.0            | 84.1       | 66.7   | 82.4     |
|               | Carangidae       |                                    | 3.4             | 0.6             | 2.4        | 0.0    | 1.1      |
|               |                  | <i>Hemicaranx bicolor</i> §        | 1.1             | 0.0             | 0.8        | 0.0    | 0.0      |
|               |                  | Carangidae n.i. ¥                  | 2.3             | 0.6             | 1.6        | 0.0    | 1.1      |
|               | Clupeidae        |                                    | 58.0            | 53.3            | 65.9       | 4.2    | 59.3     |
|               |                  | <i>Sardinella</i> n.i. ¥           | 52.3            | 18.9            | 50.8       | 4.2    | 39.6     |
|               |                  | <i>Sardinella aurita</i> ¥         | 0.0             | 3.6             | 0.0        | 0.0    | 4.4      |
|               |                  | <i>Sardinella maderensis</i> ¥     | 5.7             | 26.6            | 14.3       | 0.0    | 15.4     |
|               |                  | <i>Ethmalosa fimbriata</i> ¥       | 0.0             | 3.0             | 0.0        | 0.0    | 0.0      |
|               |                  | Clupeidae n.i. ¥                   | 0.0             | 1.2             | 0.8        | 0.0    | 0.0      |
|               | Hemiramphidae    | Hemiramphidae n.i. ¥               | 0.0             | 5.3             | 2.4        | 0.0    | 0.0      |
|               | Pristigasteridae | <i>Ilisha africana</i> ¥           | 3.4             | 8.9             | 11.9       | 62.5   | 22.0     |
|               | Scombridae       |                                    | 1.1             | 0.0             | 1.6        | 0.0    | 0.0      |
|               |                  | <i>Scomberomorus tritor</i> ¥      | 1.1             | 0.0             | 0.0        | 0.0    | 0.0      |
|               |                  | <i>Scomber colias</i> ¥            | 0.0             | 0.0             | 1.6        | 0.0    | 0.0      |
| Benthopelagic |                  |                                    | 26.1            | 29.0            | 57.1       | 25.0   | 16.5     |
|               | Ariidae          | <i>Carlarius</i> n.i. §            | 0.0             | 0.0             | 0.0        | 0.0    | 0.0      |
|               | Gerreidae        |                                    | 2.3             | 5.3             | 0.0        | 0.0    | 1.1      |
|               |                  | <i>Eucinostomus melanopterus</i> ¥ | 0.0             | 1.8             | 0.0        | 0.0    | 1.1      |
|               |                  | <i>Gerres nigri</i> ¥              | 1.1             | 2.4             | 0.0        | 0.0    | 0.0      |
|               |                  | Gerreidae n.i. ¥                   | 1.1             | 1.2             | 0.0        | 0.0    | 0.0      |
|               | Haemulidae       |                                    | 11.4            | 2.4             | 4.8        | 4.2    | 1.1      |
|               |                  | <i>Pomadasys</i> n.i. ¥            | 1.1             | 1.2             | 0.8        | 4.2    | 0.0      |
|               |                  | Haemulidae n.i. ¥                  | 10.2            | 1.2             | 4.0        | 0.0    | 1.1      |
|               | Mugilidae        |                                    | 2.3             | 8.9             | 0.0        | 0.0    | 0.0      |
|               |                  | <i>Liza</i> n.i. ¥                 | 0.0             | 0.6             | 0.0        | 0.0    | 0.0      |
|               |                  | Mugilidae n.i. ¥                   | 2.3             | 8.3             | 0.0        | 0.0    | 0.0      |
|               | Polynemidae      | <i>Galeoides decadactylus</i> ¥    | 8.0             | 8.9             | 5.6        | 4.2    | 9.9      |
|               | Sciaenidae       |                                    | 1.1             | 3.6             | 3.2        | 12.5   | 4.4      |
|               |                  | <i>Pseudolithus elongatus</i> §    | 0.0             | 1.8             | 1.6        | 8.3    | 0.0      |

|                |                   |                                  |            |            |            |            |            |
|----------------|-------------------|----------------------------------|------------|------------|------------|------------|------------|
|                |                   | <i>Pseudolithus typus</i> §      | 0.0        | 0.0        | 0.0        | 4.2        | 0.0        |
|                |                   | Pseudolithus n.i. §              | 1.1        | 0.0        | 0.0        | 0.0        | 2.2        |
|                |                   | <i>Pteroscion peli</i> §         | 0.0        | 0.6        | 1.6        | 0.0        | 2.2        |
|                |                   | Sciaenidae n.i. §                | 0.0        | 1.2        | 0.0        | 0.0        | 0.0        |
|                | Serranidae        | Epinephelus n.i. §               | 1.1        | 0.0        | 0.0        | 0.0        | 0.0        |
| <b>Benthic</b> | Paralichthyidae   | <i>Citharichthys stampflii</i> § | <b>0.0</b> | <b>0.0</b> | <b>0.8</b> | <b>4.2</b> | <b>0.0</b> |
|                | Unidentified fish |                                  | 6.8        | 3.0        | 1.6        | 4.2        | 0.0        |
|                | <b>CRUSTACEAN</b> |                                  |            |            |            |            |            |
|                | Decapoda          | Crab n.i.                        | 1.1        | 0.0        | 0.0        | 0.0        | 1.1        |

Table SIII Frequency of occurrence (FO%) and numerical frequency (N%) of prey items in pellets of Caspian Tern (*Hydroprogne caspia*) and Royal Tern (*Thalasseus maximus*) by prey domain, family species (or lowest taxonomic level identified) using only otoliths in prey identification. Samples collected from 2013 to 2015 in Guinea-Bissau and Guinea. Sample sizes (N) represent the total number of pellets analysed (in FO%) and total number of prey individuals analysed (on N%). n.i. - not identified. Prey are categorized as schooling (¥) or solitary (§)

| Domain        | Family            | Species                            | Caspian Tern   |               | Royal Tern     |               |
|---------------|-------------------|------------------------------------|----------------|---------------|----------------|---------------|
|               |                   |                                    | FO%<br>(N=152) | N%<br>(N=257) | FO%<br>(N=141) | N%<br>(N=241) |
| Pelagic       |                   |                                    | 1.3            | 1.2           | 11.3           | 7.1           |
|               | Clupeidae         | Clupeidae n.i. ¥                   | 0              | 0             | 2.8            | 1.7           |
|               | Pristigasteridae  | <i>Ilisha africana</i>             | 1.3            | 1.2           | 9.2            | 5.4           |
| Benthopelagic |                   |                                    | 17.8           | 11.7          | 16.3           | 10            |
|               | Ariidae           | <i>Carlarius</i> n.i. ¥            | 0              | 0             | 0.7            | 0.4           |
|               | Gerreidae         |                                    | 1.3            |               | 0.7            |               |
|               |                   | <i>Eucinostomus melanopterus</i> ¥ | 0.7            | 0.4           | 0.7            | 0.4           |
|               |                   | <i>Gerres nigri</i> ¥              | 0.7            | 0.4           | 0              | 0             |
|               | Haemulidae        | <i>Pomadasys</i> n.i. ¥            | 0.7            | 0.8           | 0              | 0             |
|               |                   | Haemulidae n.i. ¥                  | 5.9            | 3.9           | 4.3            | 2.5           |
|               | Mugilidae         | <i>Liza</i> n.i. ¥                 | 1.3            | 0.8           | 0              | 0             |
|               | Polynemidae       | <i>Galeoides decadactylus</i> ¥    | 4.6            | 2.7           | 4.3            | 2.5           |
|               | Sciaenidae        |                                    | 4.6            | 2.7           | 7.1            | 4.1           |
|               |                   | <i>Pseudotolithus elongates</i> §  | 2              | 1.2           | 2.1            | 1.2           |
|               |                   | <i>Pseudotolithus</i> n.i. §       | 0.7            | 0.4           | 1.4            | 0.8           |
|               |                   | <i>Pseudotolithus typus</i> §      | 0              | 0             | 0.7            | 0.4           |
|               |                   | <i>Pteroscion peli</i> §           | 0.7            | 0.4           | 2.8            | 1.7           |
|               |                   | Sciaenidae n.i. §                  | 1.3            | 0.8           | 0              | 0             |
|               |                   |                                    |                |               |                |               |
|               | Unidentified fish |                                    | 92.8           | 86.8          | 88.7           | 83            |
